# Supplementary material for: More Favorable Short and Long-Term Outcomes for Screen-Detected Colorectal Cancer Patients
Source: PubMed Central journal article supplement (PMC8005726; doi:10.3389/fonc.2021.620644), 2021-03-15
Supplement: DataSheet_1.pdf [file DataSheet_1.pdf]

## STROBE Statement

|                           | Item No | Recommendation                                                                                                                                                                                               |                     |
|---------------------------|---------|--------------------------------------------------------------------------------------------------------------------------------------------------------------------------------------------------------------|---------------------|
| Title and abstract        | 1       | (a) Indicate the study's design with a commonly used term in the title or the abstract                                                                                                                       | Y                   |
|                           |         | (b) Provide in the abstract an informative and balanced summary of what was done and what was found                                                                                                          | Y                   |
| <b>Introduction</b>       |         |                                                                                                                                                                                                              |                     |
| Background /rationale     | 2       | Explain the scientific background and rationale for the investigation being reported                                                                                                                         | Y                   |
| Objectives                | 3       | State specific objectives, including any prespecified hypotheses                                                                                                                                             | Y                   |
| <b>Methods</b>            |         |                                                                                                                                                                                                              |                     |
| Study design              | 4       | Present key elements of study design early in the paper                                                                                                                                                      | Y                   |
| Setting                   | 5       | Describe the setting, locations, and relevant dates, including periods of recruitment, exposure, follow-up, and data collection                                                                              | Y                   |
| Participants              | 6       | (a) <i>Cohort study</i> —Give the eligibility criteria, and the sources and methods of selection of participants. Describe methods of follow-up                                                              | Y                   |
|                           |         | (b) <i>Cohort study</i> —For matched studies, give matching criteria and number of exposed and unexposed                                                                                                     | Not applicable (NA) |
| Variables                 | 7       | Clearly define all outcomes, exposures, predictors, potential confounders, and effect modifiers. Give diagnostic criteria, if applicable                                                                     | Y                   |
| Data sources/ measurement | 8       | For each variable of interest, give sources of data and details of methods of assessment (measurement). Describe comparability of assessment methods if there is more than one group                         | Y                   |
| Bias                      | 9       | Describe any efforts to address potential sources of bias                                                                                                                                                    | Y                   |
| Study size                | 10      | Explain how the study size was arrived at                                                                                                                                                                    | NA                  |
| Quantitative variables    | 11      | Explain how quantitative variables were handled in the analyses. If applicable, describe which groupings were chosen and why                                                                                 | Y                   |
| Statistical methods       | 12      | (a) Describe all statistical methods, including those used to control for confounding                                                                                                                        | Y                   |
|                           |         | (b) Describe any methods used to examine subgroups and interactions                                                                                                                                          | Y                   |
|                           |         | (c) Explain how missing data were addressed                                                                                                                                                                  | Y                   |
|                           |         | (d) <i>Cohort study</i> —If applicable, explain how loss to follow-up was addressed                                                                                                                          | NA                  |
|                           |         | (e) Describe any sensitivity analyses                                                                                                                                                                        | Not performed       |
| <b>Results</b>            |         |                                                                                                                                                                                                              |                     |
| Participants              | 13      | (a) Report numbers of individuals at each stage of study—eg numbers potentially eligible, examined for eligibility, confirmed eligible, included in the study, completing follow-up, and analysed            | Y                   |
|                           |         | (b) Give reasons for non-participation at each stage                                                                                                                                                         | NA                  |
|                           |         | (c) Consider use of a flow diagram                                                                                                                                                                           | Not relevant        |
| Descriptive data          | 14      | (a) Give characteristics of study participants (eg demographic, clinical, social) and information on exposures and potential confounders                                                                     | Y                   |
|                           |         | (b) Indicate number of participants with missing data for each variable of interest                                                                                                                          | Y                   |
|                           |         | (c) <i>Cohort study</i> —Summarise follow-up time (eg, average and total amount)                                                                                                                             | NA                  |
| Outcome data              | 15      | <i>Cohort study</i> —Report numbers of outcome events or summary measures over time                                                                                                                          | Y                   |
| Main results              | 16      | (a) Give unadjusted estimates and, if applicable, confounder-adjusted estimates and their precision (eg, 95% confidence interval). Make clear which confounders were adjusted for and why they were included | Y                   |
|                           |         | (b) Report category boundaries when continuous variables were categorized                                                                                                                                    | Y                   |
|                           |         | (c) If relevant, consider translating estimates of relative risk into absolute risk for a meaningful time period                                                                                             | Not relevant        |
| Other analyses            | 17      | Report other analyses done—eg analyses of subgroups and interactions, and sensitivity analyses                                                                                                               | Not performed       |
| <b>Discussion</b>         |         |                                                                                                                                                                                                              |                     |
| Key results               | 18      | Summarise key results with reference to study objectives                                                                                                                                                     | Y                   |

|                          |    |                                                                                                                                                                            |    |
|--------------------------|----|----------------------------------------------------------------------------------------------------------------------------------------------------------------------------|----|
| Limitations              | 19 | Discuss limitations of the study, taking into account sources of potential bias or imprecision. Discuss both direction and magnitude of any potential bias                 | Y  |
| Interpretation           | 20 | Give a cautious overall interpretation of results considering objectives, limitations, multiplicity of analyses, results from similar studies, and other relevant evidence | Y  |
| Generalisability         | 21 | Discuss the generalisability (external validity) of the study results                                                                                                      | Y  |
| <b>Other information</b> |    |                                                                                                                                                                            |    |
| Funding                  | 22 | Give the source of funding and the role of the funders for the present study and, if applicable, for the original study on which the present article is based              | NA |
